# Supplementary material for: Sulfate radical-mediated methane conversion to C–C and C–S products in water
Source: Royal Society of Chemistry journal article supplement (doi:10.1039/d5gc05500h), 2025-12-18
Supplement: d5gc05500h1.pdf [file d5gc05500h1.pdf]

## Supporting Information

### Sulfate Radical–Mediated Methane Conversion to C-C and C-S Products in Water

Mujing Huang,†<sup>a</sup> Fanxun Lv,†<sup>a</sup> Yi Lv,<sup>a</sup> Jiajun Yan<sup>a</sup> and Chenlu Xie<sup>\*a, b</sup>

<sup>a</sup> M. Huang, F. Lv, Y. Lv, Prof. J. Yan, Prof. C. Xie

School of Physical Science and Technology, ShanghaiTech University, Shanghai, 201210, China

E-mail: xiechl@shanghaitech.edu.cn

<sup>b</sup> Prof. C. Xie

Shanghai Key Laboratory of High-Resolution Electron Microscopy, ShanghaiTech University, Shanghai, 201210, China

† These authors contributed equally to this work.

## Experimental section

### Chemicals and materials

Potassium persulfate ( $\text{K}_2\text{S}_2\text{O}_8$ ) ( $\geq 99.99\%$ ), Sodium methyl sulfate ( $> 98.0\%$ ), Dimethyl sulfone ( $\geq 99\%$ ), Methanesulfonic acid ( $\geq 98\%$ ), Acetic acid ( $\geq 99.7\%$ ), Sodium ethyl sulfate ( $\geq 98\%$ ), Dioxane ( $\geq 99.5\%$ ) and 5,5-dimethyl-1-pyrroline N-oxide (DMPO) ( $\geq 97\%$ ) were purchased from Shanghai Aladdin Biochemical Technology Co.  $\text{CH}_4$  (99.9%), Ar (99.999%),  $\text{O}_2$  (99.999%), CO (99.9%),  $\text{C}_2\text{H}_6$  (99.99%),  $^{13}\text{CH}_4$  ( $^{13}\text{C}$  enrichment  $> 99\%$  atom) were purchased from Wen Dong (Shanghai) Chemical Co.  $\text{D}_2\text{O}$  (99.9%D) was purchased from Energy Chemical Co. Dimethyl sulfoxide (DMSO) ( $\geq 99.9\%$ ) and Acetone ( $\geq 99.5\%$ ) were purchased from Sinopharm Chemical Reagent Co. All chemicals and gases were used as received.

### Photochemical $\text{CH}_4$ functionalization measurements

In a typical experiment, photochemical reactions were conducted in a 250 mL high-pressure reactor (SenLong, LC250) equipped with a sapphire window for light irradiation (Figure S2). The reactor was charged with 100 mL of 50 mM  $\text{K}_2\text{S}_2\text{O}_8$  aqueous solution and purged with Ar (99.999%) to remove the air. Subsequently,  $\text{CH}_4$  (99.9%) was introduced to a final pressure of 2.5 MPa. The reaction mixture was irradiated with a 365 nm UV LED lamp (Perfectlight, PLS-LED100C) under continuous stirring at  $25 \pm 4$  °C.

Gas-phase products were analyzed using a gas chromatograph (GC, Agilent 8890) equipped with a flame ionization detector (FID) and a thermal conductivity detector (TCD). Liquid-phase products were quantified by  $^1\text{H}$  NMR (Bruker 400 MHz). For NMR analysis, 450  $\mu\text{L}$  of the reaction solution was mixed with 50  $\mu\text{L}$   $\text{D}_2\text{O}$  containing 0.04 wt% DMSO ( $\delta = 2.72$  ppm) as internal standard. Water suppression was applied during acquisition. The concentrations of the products were determined by comparing the area of their  $^1\text{H}$  NMR signals to calibration curves. These curves were prepared using pure samples of each chemical (Figure S3).

The liquid product selectivity and CH<sub>4</sub> conversion were calculated as follows:

$$\text{Liquid product selectivity (\%)} = \frac{\text{mol}_{\text{total formed liquid products}}}{\text{mol}_{\text{total formed products}}} \times 100\%$$

$$\text{CH}_4 \text{ conversion (\%)} = \frac{\text{mol}_{\text{total formed products}}}{\text{mol}_{\text{initial CH}_4}} \times 100\%$$

The initial CH<sub>4</sub> amount in the system is calculated according to the following equation (V is the volume of the headspace of the reactor, R is the gas constant):

$$\text{mol}_{\text{initial CH}_4} = \frac{P_{\text{CH}_4} \times V}{R \times T(298\text{K})}$$

Please note that the CH<sub>4</sub> conversion reported in Figure 4b was determined under flow mode conditions without collecting the effluent gas. Thus, the actual CH<sub>4</sub> conversion would be higher.

### **CH<sub>4</sub> functionalization in a photochemical flow reactor**

The continuous-flow photochemical conversion of CH<sub>4</sub> was conducted in a custom-built photochemical flow reactor (MICROFLU V6G, Figure S15). An aqueous K<sub>2</sub>S<sub>2</sub>O<sub>8</sub> solution (50 mM) and CH<sub>4</sub> (0.1 MPa) were premixed in a microfluidic device to generate a uniform stream of gas bubbles in the liquid. This gas-liquid mixture was then pumped into an 18 mL reaction chip. The reactor was sandwiched between two 365 nm LED panels (252 0.5 W LEDs on each panel) to ensure uniform irradiation. The reaction temperature was maintained at 25 °C by flowing aqueous ethylene glycol through the central jacket within the reaction chip, and the residence time was controlled by adjusting the gas and liquid flow rates. The two LED panels were cooled with another stream of aqueous ethylene glycol flown through aluminum jackets. Liquid products were collected at the reactor outlet and quantified by <sup>1</sup>H NMR, while gaseous products were quantified by GC.

### **Products analysis using isotope-labeled <sup>13</sup>CH<sub>4</sub>**

Isotope-labeling experiments were performed with pure <sup>13</sup>CH<sub>4</sub> in the photochemical flow reactor. A 50 mM K<sub>2</sub>S<sub>2</sub>O<sub>8</sub> aqueous solution and 0.1 MPa <sup>13</sup>CH<sub>4</sub>

were introduced into the 18 mL reaction chip. The reactor was then irradiated with 365 nm LED lamps for 30 min. After irradiation, the reaction mixture was analyzed using a Bruker 400 MHz NMR spectrometer, and  $^1\text{H}$  NMR,  $^{13}\text{C}$  NMR and HSQC (two-dimensional  $^1\text{H}$ - $^{13}\text{C}$  heteronuclear single quantum correlation spectroscopy) spectra were collected (Figure S5, Figure S6 and Figure 1e).

### **Electrospray ionization mass spectrometry (ESI-MS) analysis**

Excess inorganic salts (mainly  $\text{K}_2\text{SO}_4$ ) in the sample needed to be removed from the reaction solution before ESI-MS analysis. A 50 mL aliquot of the solution was concentrated by heating to remove most of the water. Dioxane was then added to the concentrated residue to precipitate the inorganic salts until no crystals were observed. Finally, 100  $\mu\text{L}$  of sample of the clear supernatant was collected and diluted with  $\text{CH}_3\text{OH}$ . The resulting solution was analyzed by high-resolution mass spectrometry (Thermo Fisher) equipped with an electrospray ionization source. It is worth noting that because the sample preparation involves a heating step, only non-volatile products with boiling points higher than water can be analyzed, such as methanesulfonic acid ( $\text{CH}_3\text{SO}_3\text{H}$ ) and methyl bisulfate ( $\text{CH}_3\text{SO}_4\text{H}$ ).

### **Determination of $\text{K}_2\text{S}_2\text{O}_8$ concentration**

The residual  $\text{K}_2\text{S}_2\text{O}_8$  concentration after the photochemical reactions was determined using an iodometric method<sup>1</sup> with UV–Vis spectroscopy. A KI stock solution was prepared by dissolving 20 g KI and 1 g  $\text{NaHCO}_3$  in 200 mL deionized water, where the  $\text{NaHCO}_3$  was added to prevent the oxidation of KI. For each measurement, 0.05 mL of the reaction solution was mixed with 2.45 mL of the KI stock solution. The absorbance of the mixture was then measured at 346 nm on a UV–Vis spectrometer (PerkinElmer, Lambda 265). The  $\text{K}_2\text{S}_2\text{O}_8$  concentration was calculated by comparing the absorbance value to a calibration curve prepared from standard solutions (Figure S7b).

### **Electron paramagnetic resonance (EPR) measurement**

EPR measurements were conducted at room temperature using Bruker EMXplus spectrometer. For a typical experiment, 100 mM DMPO and 50 mM  $\text{K}_2\text{S}_2\text{O}_8$  were mixed in either  $\text{H}_2\text{O}$  or DMSO. This mixture bubbled with  $\text{CH}_4$  or Ar for 30 min. Subsequently, the solution was transferred to a quartz EPR capillary and irradiated with a 365 nm LED light source. EPR spectra were recorded immediately upon irradiation.

#### **In situ Fourier transform infrared spectroscopy (FTIR) measurement**

The FTIR spectra were recorded on a Bruker VERTEX 70 FTIR spectrometer. The reaction mixture was loaded into the sample cell, and a stream of humidified  $\text{CH}_4$  gas was continuously introduced into the system for 30 min. Spectra were collected at a resolution of  $2\text{ cm}^{-1}$  with 64 scans per spectrum. The evolution of the reaction was monitored continuously over a 30-minute period under light irradiation.

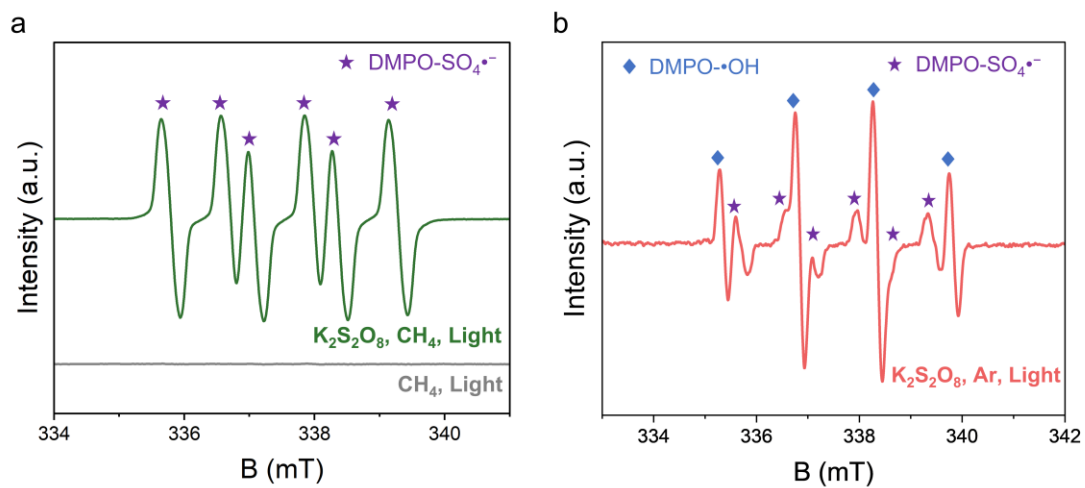

**Figure S1.** (a), EPR spectra of  $\text{SO}_4^{\bullet-}$  in DMSO. Green: with  $\text{K}_2\text{S}_2\text{O}_8$ ; grey: without  $\text{K}_2\text{S}_2\text{O}_8$ . (b), EPR spectra of  $\text{K}_2\text{S}_2\text{O}_8$  bubbled with Ar.

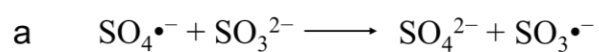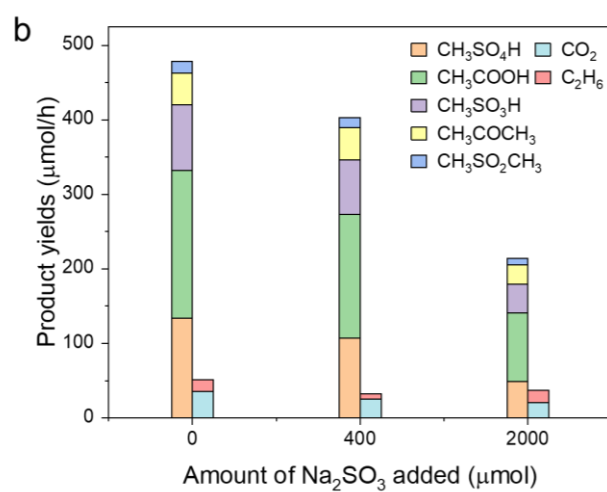

**Figure S2.** Scavenging experiments using Na<sub>2</sub>SO<sub>3</sub> as a selective SO<sub>4</sub><sup>•-</sup> scavenger. **a**, Reaction mechanism for the scavenging of SO<sub>4</sub><sup>•-</sup> by SO<sub>3</sub><sup>2-</sup>.<sup>2</sup> **b**, Variation in product yields with Na<sub>2</sub>SO<sub>3</sub> addition.

Reaction conditions: 2.5 MPa CH<sub>4</sub>, 100 mL 50 mM K<sub>2</sub>S<sub>2</sub>O<sub>8</sub> aqueous solution, 1 h reaction time, 25 °C, 365 nm UV LED (80 mW/cm<sup>2</sup>).

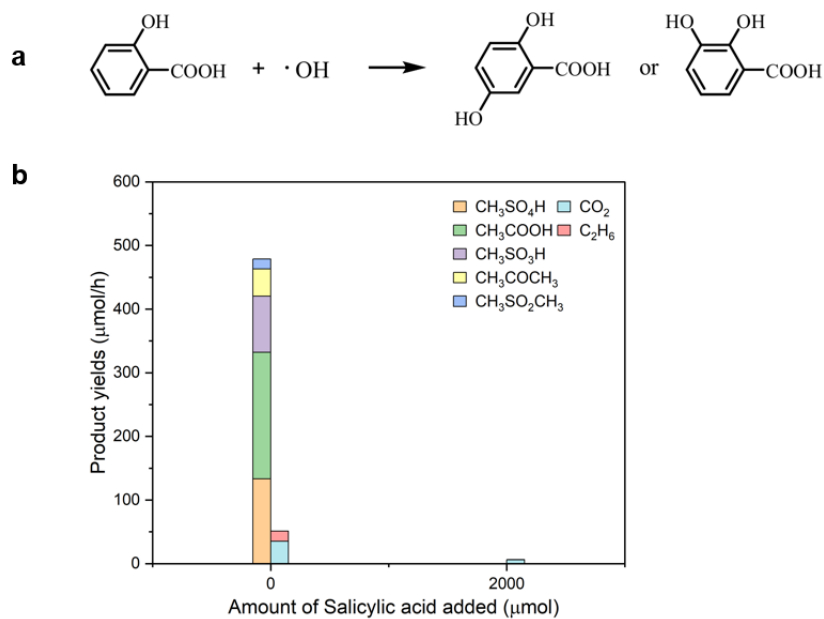

**Figure S3.** Scavenging experiments using salicylic acid as a selective  $\cdot\text{OH}$  scavenger.

**a**, Reaction mechanism for the scavenging of  $\cdot\text{OH}$  by salicylic acid.<sup>3</sup> **b**, Variation in product yields with salicylic acid addition.

Reaction conditions: 2.5 MPa  $\text{CH}_4$ , 100 mL 50 mM  $\text{K}_2\text{S}_2\text{O}_8$  aqueous solution, 1 h reaction time, 25  $^\circ\text{C}$ , 365 nm UV LED (80  $\text{mW}/\text{cm}^2$ ).

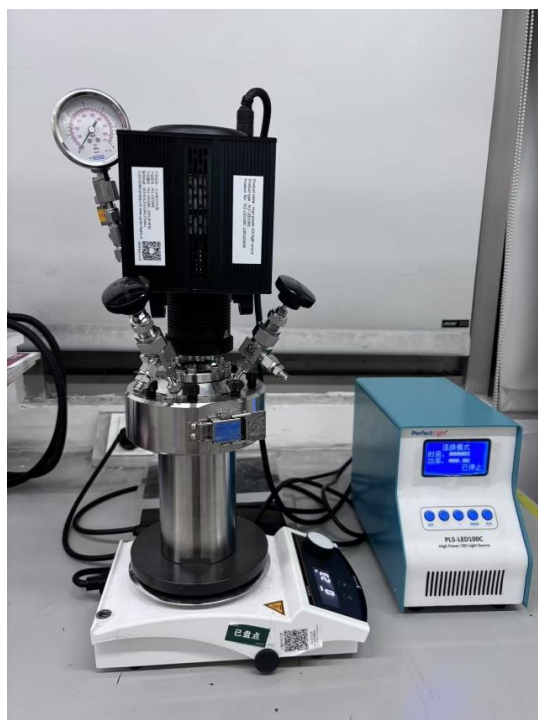

**Figure S4.** Image of the laboratory-scale high-pressure batch photoreactor used for methane functionalization experiments.

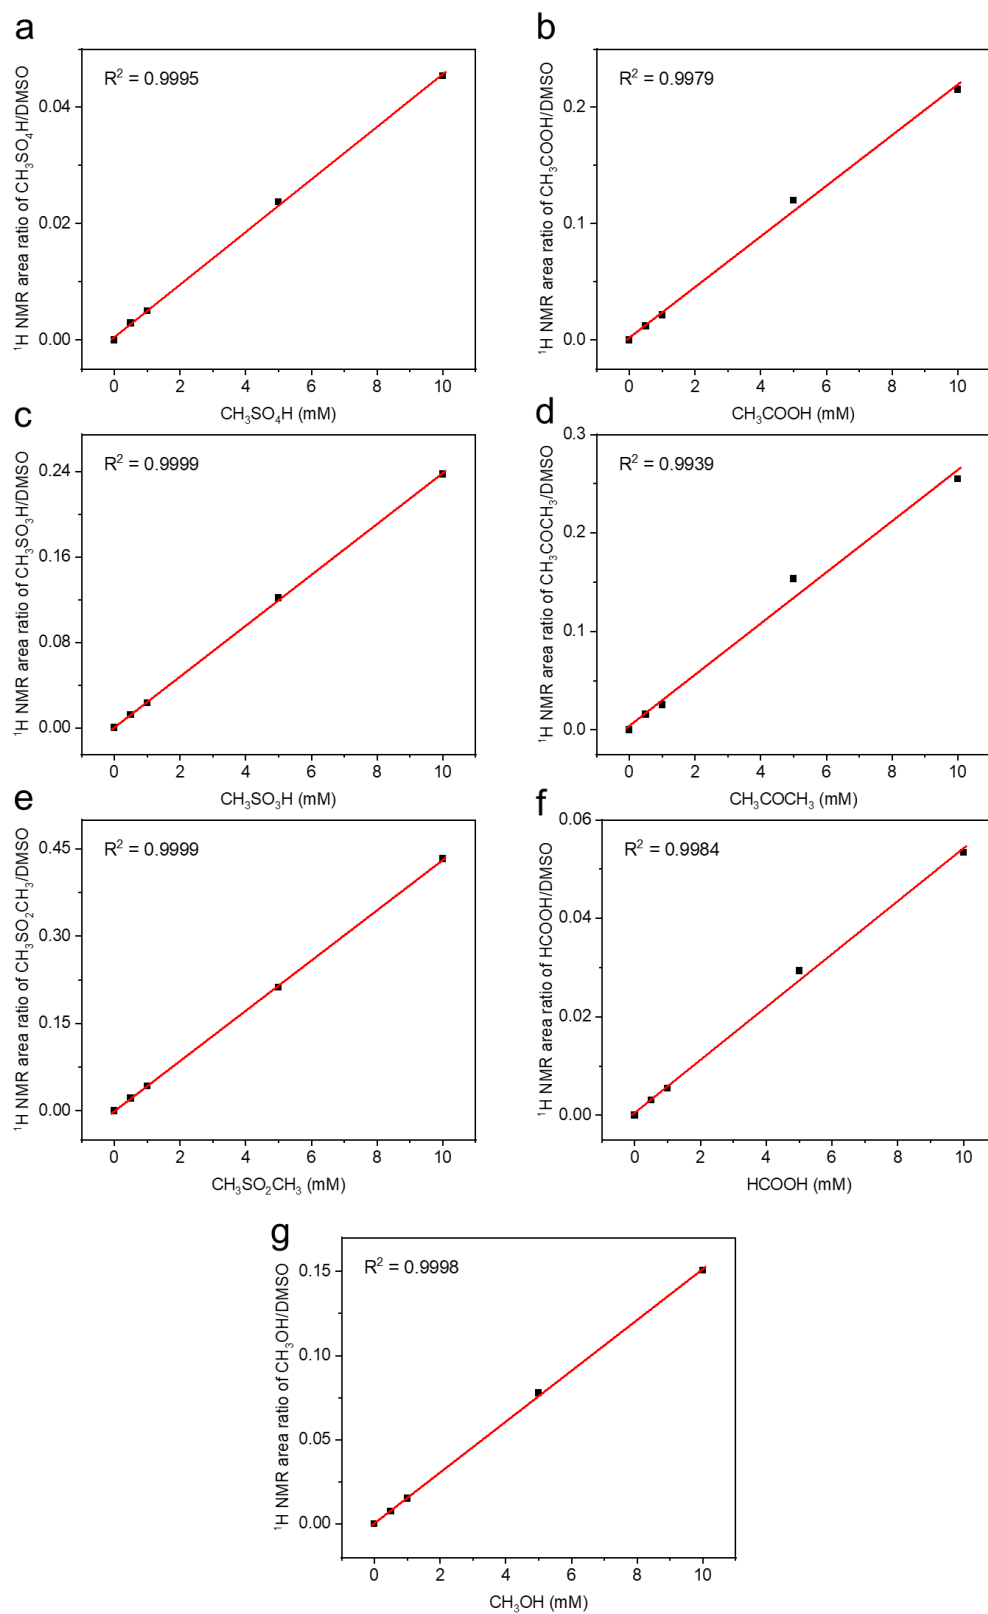

**Figure S5.** Calibration curves for the quantification of  $\text{CH}_3\text{SO}_4\text{H}$  (a),  $\text{CH}_3\text{COOH}$  (b),  $\text{CH}_3\text{SO}_3\text{H}$  (c),  $\text{CH}_3\text{COCH}_3$  (d),  $\text{CH}_3\text{SO}_2\text{CH}_3$  (e),  $\text{HCOOH}$  (f), and  $\text{CH}_3\text{OH}$  (g) by  $^1\text{H}$  NMR.

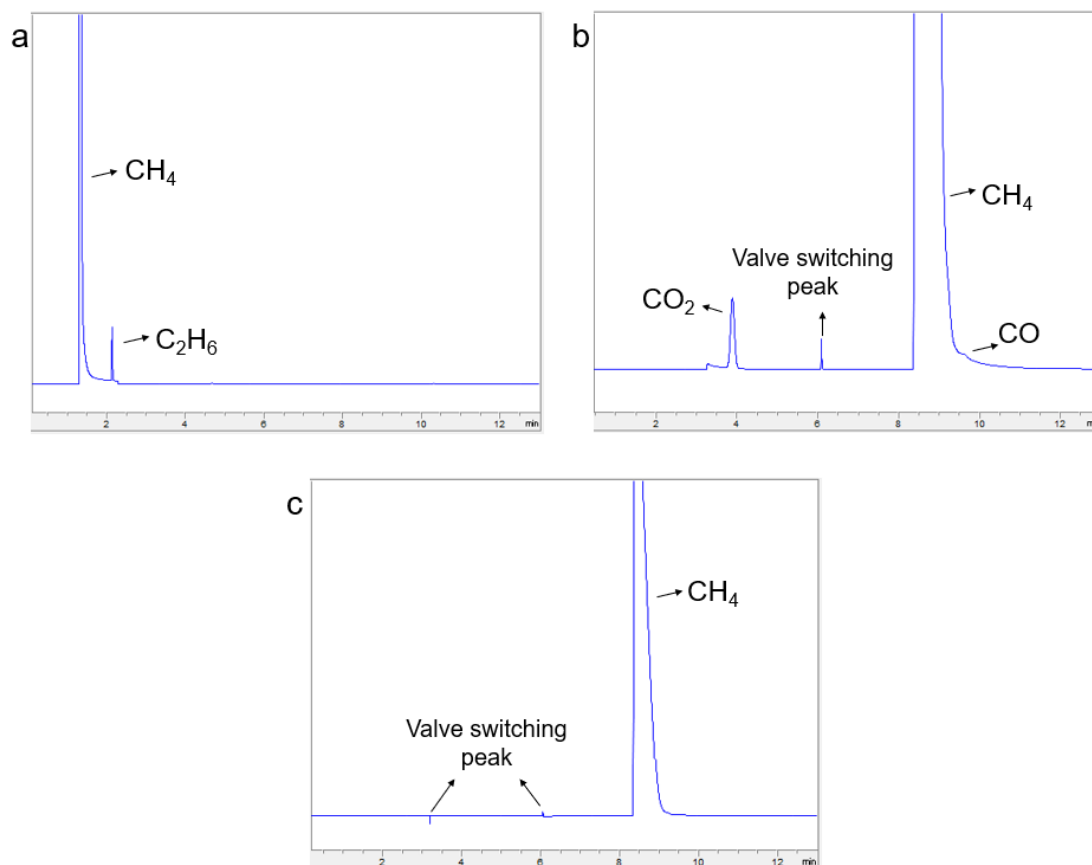

**Figure S6.** Representative GC spectrum obtained from a typical experiment. **a**, FID signals corresponding to  $\text{CH}_4$  and  $\text{C}_2\text{H}_6$ . **b**, FID signal corresponding to  $\text{CO}_2$ . **c**, TCD signals corresponding to  $\text{O}_2$  and  $\text{N}_2$ .

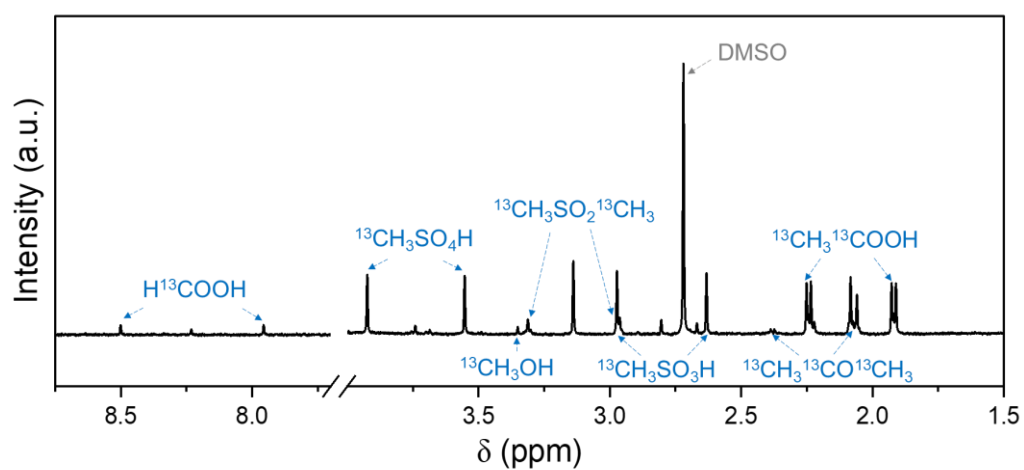

**Figure S7.**  $^1\text{H}$  NMR spectrum from the  $^{13}\text{CH}_4$  isotope-labeling experiment. Reaction condition:  $^{13}\text{CH}_4$  (0.1 MPa) and  $\text{K}_2\text{S}_2\text{O}_8$  (50 mM) in a photochemical flow reactor under UV irradiation.

Note: Minor production of  $\text{CH}_3\text{OH}$  and  $\text{HCOOH}$  (< 1% combined selectivity) were also observed in the reaction (Table S2).

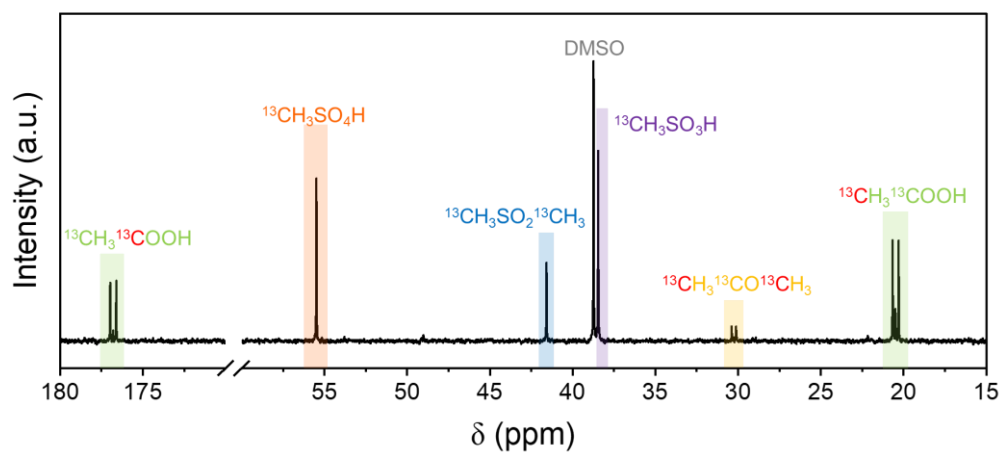

**Figure S8.**  $^{13}\text{C}$  NMR spectrum from the  $^{13}\text{CH}_4$  isotope-labeling experiment. Reaction condition:  $^{13}\text{CH}_4$  (0.1 MPa) and  $\text{K}_2\text{S}_2\text{O}_8$  (50 mM) in a photochemical flow reactor under UV irradiation.

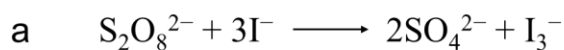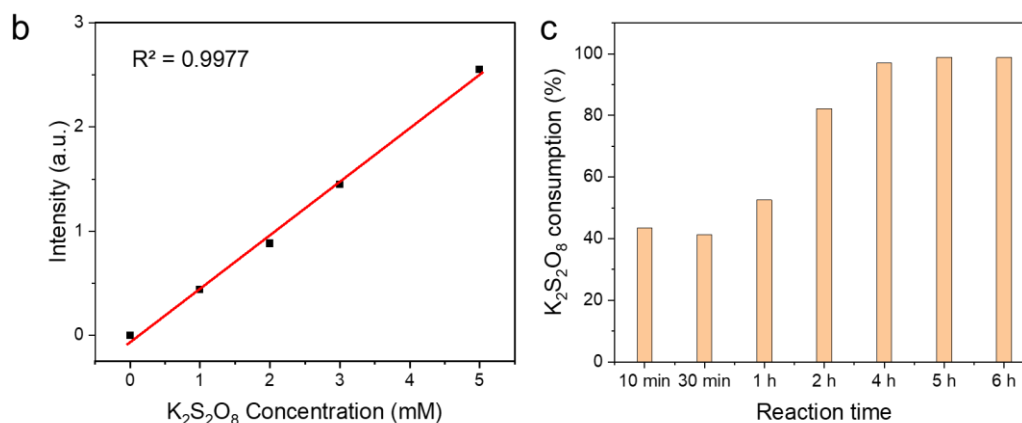

**Figure S9.** Quantification of K<sub>2</sub>S<sub>2</sub>O<sub>8</sub>. **a**, Reaction scheme for the iodometric titration method used to determine K<sub>2</sub>S<sub>2</sub>O<sub>8</sub> concentration.<sup>4</sup> **b**, Calibration curve for the quantification of S<sub>2</sub>O<sub>8</sub><sup>2-</sup> by colorimetric method. **c**, K<sub>2</sub>S<sub>2</sub>O<sub>8</sub> consumption as a function of reaction time. Reaction conditions: 2.5 MPa CH<sub>4</sub>, 100 mL 50 mM K<sub>2</sub>S<sub>2</sub>O<sub>8</sub> aqueous solution, reaction temperature: 25 °C, light source: 365 nm UV LED, 80 mW/cm<sup>2</sup>.

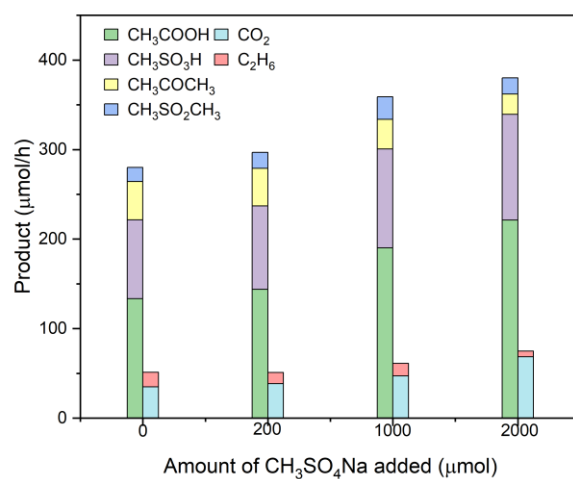

**Figure S10.** The effect of CH<sub>3</sub>SO<sub>4</sub>Na addition over the CH<sub>4</sub> functionalization. Reaction conditions: 2.5 MPa CH<sub>4</sub>, 100 mL 50 mM K<sub>2</sub>S<sub>2</sub>O<sub>8</sub> aqueous solution, 1 h reaction time, 25 °C, 365 nm UV LED (80 mW/cm<sup>2</sup>).

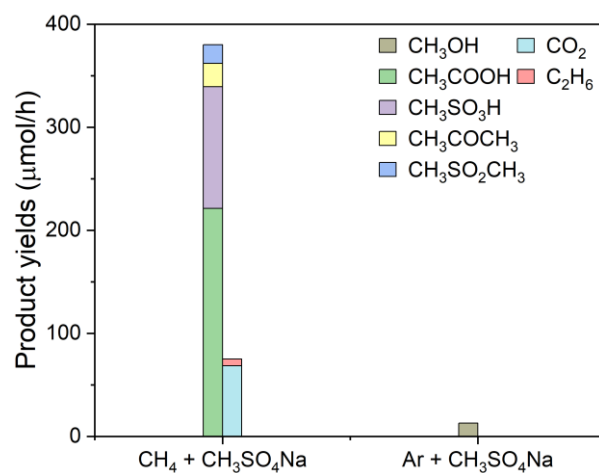

**Figure S11.** The effect of CH<sub>4</sub> on the conversion of CH<sub>3</sub>SO<sub>4</sub>H. Reaction conditions: 2.5 MPa CH<sub>4</sub> or Ar, 2 mmol CH<sub>3</sub>SO<sub>4</sub>Na, 100 mL 50 mM K<sub>2</sub>S<sub>2</sub>O<sub>8</sub> aqueous solution, 1 h reaction time, 25 °C, 365 nm UV LED (80 mW/cm<sup>2</sup>).

Note: Only CH<sub>3</sub>OH observed in the experiment with Ar, which originates from the hydrolysis of the added CH<sub>3</sub>SO<sub>4</sub>Na.

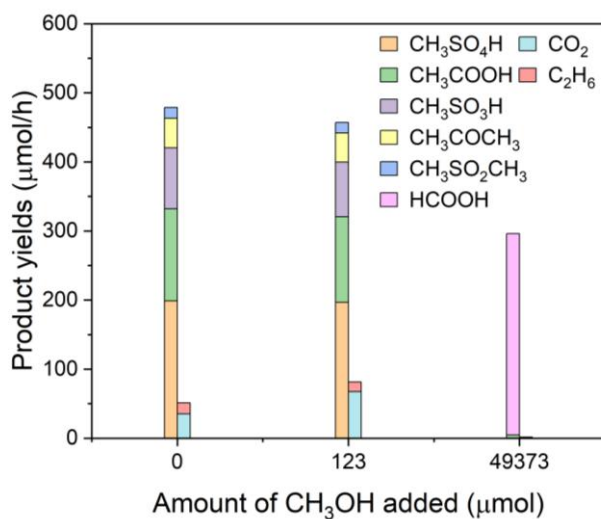

**Figure S12.** The effect of CH<sub>3</sub>OH addition over the CH<sub>4</sub> functionalization. Reaction conditions: 2.5 MPa CH<sub>4</sub>, 100 mL 50 mM K<sub>2</sub>S<sub>2</sub>O<sub>8</sub> aqueous solution, 1 h reaction time, 25 °C, 365 nm UV LED (80 mW/cm<sup>2</sup>).

Note: The addition of small amounts of CH<sub>3</sub>OH have negligible effect on product yields, while excess CH<sub>3</sub>OH competes with CH<sub>4</sub>, resulting in the formation of HCOOH through CH<sub>3</sub>OH overoxidation. This result indicates CH<sub>3</sub>OH is not a key intermediate in CH<sub>4</sub> functionalization.

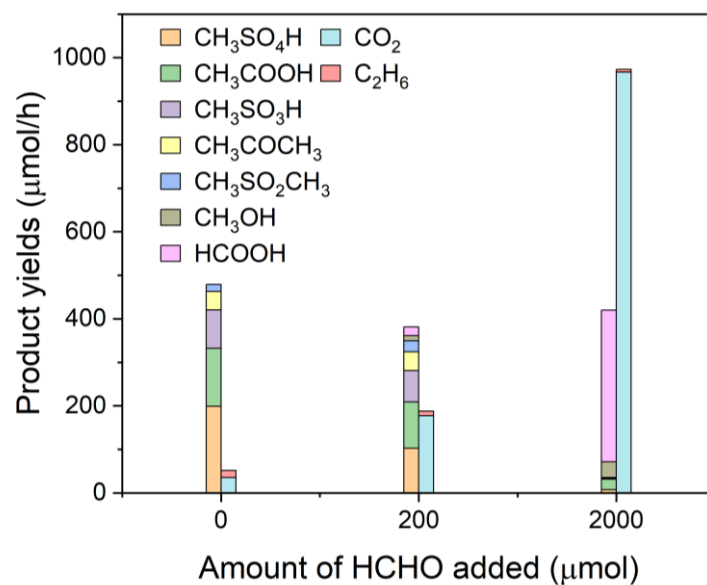

**Figure S13.** The effect of HCHO addition over the CH<sub>4</sub> functionalization. Reaction conditions: 2.5 MPa CH<sub>4</sub>, 100 mL 50 mM K<sub>2</sub>S<sub>2</sub>O<sub>8</sub> aqueous solution, 1 h reaction time, 25 °C, 365 nm UV LED (80 mW/cm<sup>2</sup>).

Note: The addition of HCHO leads to overoxidation, resulting in the formation of CO<sub>2</sub> and HCOOH.

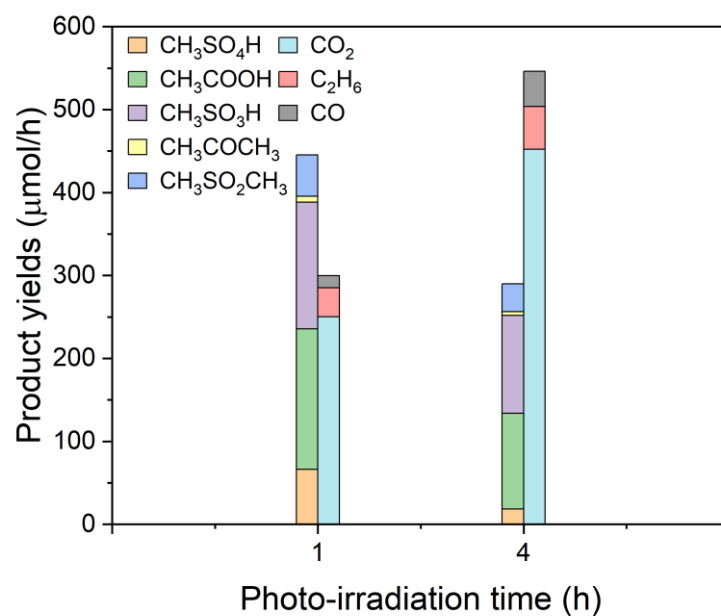

**Figure S14.** Product yields of CH<sub>4</sub> functionalization in small water volume. Reaction conditions: 2.5 MPa CH<sub>4</sub>, 20 mL 250 mM K<sub>2</sub>S<sub>2</sub>O<sub>8</sub> aqueous solution, 25 °C, 365 nm UV LED (80 mW/cm<sup>2</sup>).

Note: CO was observed only under conditions with small water volume. Its absence in other experiments is likely due to its low production level.

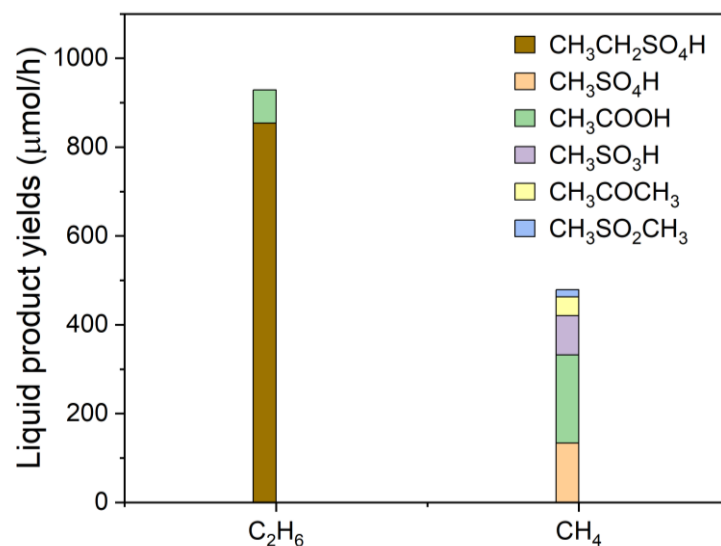

**Figure S15.** Comparison of CH<sub>4</sub> and C<sub>2</sub>H<sub>6</sub> functionalization with K<sub>2</sub>S<sub>2</sub>O<sub>8</sub>. Reaction conditions: 2.5 MPa CH<sub>4</sub> or C<sub>2</sub>H<sub>6</sub>, 100 mL 50 mM K<sub>2</sub>S<sub>2</sub>O<sub>8</sub> aqueous solution, 1 h reaction time, 25 °C, 365 nm UV LED (80 mW/cm<sup>2</sup>).

Note: In the C<sub>2</sub>H<sub>6</sub> functionalization process, ethyl sulfate was observed as the major product, along with a small amount of CH<sub>3</sub>COOH. Ethyl sulfate is presumably generated through the coupling of an ethyl radical with a sulfate radical. In contrast to reactions using CH<sub>4</sub>, no C-S product or C-C product observed.

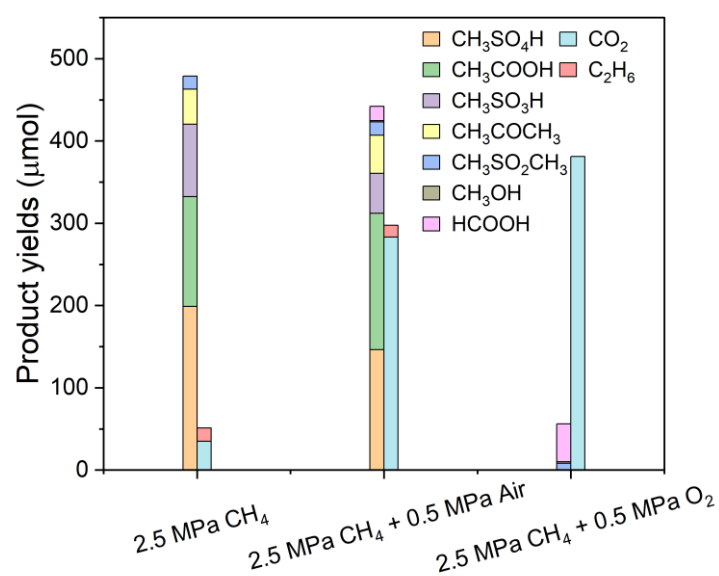

**Figure S16.** Influence of O<sub>2</sub> on CH<sub>4</sub> functionalization. Reaction conditions: 100 mL 50 mM K<sub>2</sub>S<sub>2</sub>O<sub>8</sub> aqueous solution, 1 h reaction time, 25 °C, 365 nm UV LED (80 mW/cm<sup>2</sup>).

Note: Overoxidation becomes more pronounced as the O<sub>2</sub> concentration increases.

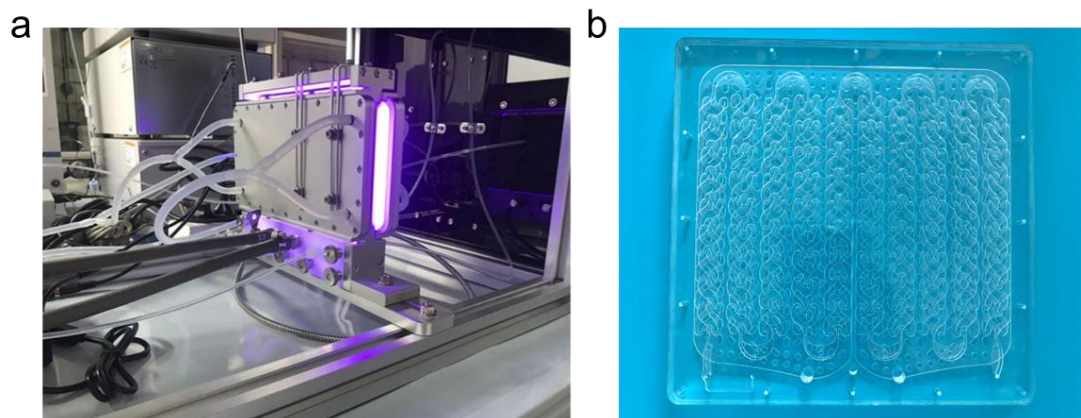

**Figure S17.** Image of the photochemical flow reactor used for methane functionalization (a) and an 18 mL reaction chip (b).

**Table S1.** Product yields for sulfate radical-mediated CH<sub>4</sub> functionalization under various reaction conditions

| Entry          | Reaction condition                                                     | Product yields (μmol/h)           |                      |                                   |                                   |                                                 |                 |                               | All products (μmol/h) | Liquid product Selectivity (%) |
|----------------|------------------------------------------------------------------------|-----------------------------------|----------------------|-----------------------------------|-----------------------------------|-------------------------------------------------|-----------------|-------------------------------|-----------------------|--------------------------------|
|                |                                                                        | CH <sub>3</sub> SO <sub>4</sub> H | CH <sub>3</sub> COOH | CH <sub>3</sub> SO <sub>3</sub> H | CH <sub>3</sub> COCH <sub>3</sub> | CH <sub>3</sub> SO <sub>2</sub> CH <sub>3</sub> | CO <sub>2</sub> | C <sub>2</sub> H <sub>6</sub> |                       |                                |
| 1              | CH <sub>4</sub> + K <sub>2</sub> S <sub>2</sub> O <sub>8</sub>         | 188.7                             | 169.2                | 106.2                             | 50.2                              | 29.6                                            | 56.3            | 3.9                           | 604.0                 | 90.0                           |
| 2 <sup>a</sup> | Ar + K <sub>2</sub> S <sub>2</sub> O <sub>8</sub>                      | 0                                 | 0                    | 0                                 | 0                                 | 0                                               | 0               | 0                             | 0                     | 0                              |
| 3 <sup>b</sup> | CH <sub>4</sub> + H <sub>2</sub> O                                     | 0                                 | 0                    | 0                                 | 0                                 | 0                                               | 0               | 0                             | 0                     | 0                              |
| 4 <sup>c</sup> | CH <sub>4</sub> + K <sub>2</sub> S <sub>2</sub> O <sub>8</sub><br>dark | 0                                 | 0                    | 0                                 | 0                                 | 0                                               | 0               | 0                             | 0                     | 0                              |

Reaction conditions (unless otherwise noted): 2.5 MPa CH<sub>4</sub>, 150 mL 50 mM K<sub>2</sub>S<sub>2</sub>O<sub>8</sub> aqueous solution, 1 h reaction time, 25 °C, 365 nm UV LED (80 mW/cm<sup>2</sup>).

<sup>a</sup> Entry 2: Reaction was conducted under Ar.

<sup>b</sup> Entry 3: Deionized water was used instead of K<sub>2</sub>S<sub>2</sub>O<sub>8</sub> aqueous solution.

<sup>c</sup> Entry 4: Reaction was conducted in the dark.

**Table S2.** Yields of CH<sub>3</sub>OH, HCOOH, and total products in CH<sub>4</sub> functionalization as a function of photo-irradiation time

| Entry | Photo-irradiation time (h) | CH <sub>3</sub> OH product (μmol) | HCOOH product (μmol) | All products (μmol) |
|-------|----------------------------|-----------------------------------|----------------------|---------------------|
| 1     | 0.5                        | 0                                 | 0                    | 406.2               |
| 2     | 1                          | 0.5                               | 2.2                  | 532.7               |
| 3     | 2                          | 0.6                               | 1.6                  | 698.8               |
| 4     | 4                          | 2.2                               | 4.5                  | 932.7               |
| 5     | 5                          | 1.4                               | 4.8                  | 946.4               |

Reaction conditions: 2.5 MPa CH<sub>4</sub>, 100 mL 50 mM K<sub>2</sub>S<sub>2</sub>O<sub>8</sub> aqueous solution, 25 °C, 365 nm UV LED (80 mW/cm<sup>2</sup>).

Note: At different irradiation times, the selectivity of the minor liquid byproducts (methanol and formic acid) was below 1%.

**Table S3.** Reaction conditions and MBS production rates compared with reported literatures.

| Catalysts                       | Oxidant/<br>reactant                         | Solvent                                      | Temperature<br>(°C) | CH <sub>4</sub> Pressure<br>(bar) | MBS yields<br>(μmol/h) | Ref.          |
|---------------------------------|----------------------------------------------|----------------------------------------------|---------------------|-----------------------------------|------------------------|---------------|
| / <sup>a</sup>                  | K <sub>2</sub> S <sub>2</sub> O <sub>8</sub> | H <sub>2</sub> O                             | 25                  | 25                                | 563.9                  | This work     |
| (V)-oxo<br>dimer                | Echem                                        | 98% H <sub>2</sub> SO <sub>4</sub>           | 25                  | 1                                 | 0.2                    | <sup>5</sup>  |
| Ag <sub>2</sub> SO <sub>4</sub> | Echem                                        | 98% H <sub>2</sub> SO <sub>4</sub>           | 25                  | 12.4                              | 0.292                  | <sup>6</sup>  |
| K <sub>2</sub> CrO <sub>4</sub> | Echem                                        | 98% H <sub>2</sub> SO <sub>4</sub>           | 25                  | 1                                 | 0.515                  | <sup>7</sup>  |
| K <sub>2</sub> CrO <sub>4</sub> | Echem                                        | 98% H <sub>2</sub> SO <sub>4</sub>           | 25                  | 11                                | 5.9                    | <sup>7</sup>  |
| PdSO <sub>4</sub>               | Echem and<br>SO <sub>3</sub>                 | oleum with<br>20 wt% free<br>SO <sub>3</sub> | 70                  | 34                                | 7.4                    | <sup>8</sup>  |
| (bpym)PtCl <sub>2</sub>         | SO <sub>3</sub>                              | 102% H <sub>2</sub> SO <sub>4</sub>          | 220                 | 34                                | 32000                  | <sup>9</sup>  |
| HgSO <sub>4</sub>               | H <sub>2</sub> SO <sub>4</sub>               | 100% H <sub>2</sub> SO <sub>4</sub>          | 180                 | 34.5                              | 108000                 | <sup>10</sup> |

<sup>a</sup> Reaction conditions: 2.5 MPa CH<sub>4</sub>, 100 mL 50 mM K<sub>2</sub>S<sub>2</sub>O<sub>8</sub> aqueous solution, 1 h reaction time, 25 °C, 365 nm UV LED (320 mW/cm<sup>2</sup>).

**Table S4.** Reaction conditions and MSA production rates compared with reported literatures.

| Catalysts         | Oxidant/<br>reactant                         | Solvent                                      | Temperature<br>(°C) | CH <sub>4</sub> Pressure<br>(bar) | MSA yields<br>( $\mu$ mol/h) | Ref.      |
|-------------------|----------------------------------------------|----------------------------------------------|---------------------|-----------------------------------|------------------------------|-----------|
| / <sup>a</sup>    | K <sub>2</sub> S <sub>2</sub> O <sub>8</sub> | H <sub>2</sub> O                             | 25                  | 25                                | 136.9                        | This work |
| HgSO <sub>4</sub> | SO <sub>3</sub>                              | oleum with 30 wt%<br>free SO <sub>3</sub>    | 160                 | 69                                | 266.7                        | 11        |
| /                 | Echem                                        | 98% H <sub>2</sub> SO <sub>4</sub>           | 140                 | 70                                | 281.3                        | 12        |
| /                 | Echem                                        | oleum with 20-30<br>wt% free SO <sub>3</sub> | 70                  | 90                                | 504.5                        | 13        |
| /                 | K <sub>2</sub> S <sub>2</sub> O <sub>8</sub> | oleum with 30 wt%<br>free SO <sub>3</sub>    | 90                  | 69                                | 3800                         | 11        |
| RuCl <sub>3</sub> | H <sub>2</sub> O <sub>2</sub>                | oleum with 30 wt%<br>free SO <sub>3</sub>    | 65                  | 45                                | 6100                         | 14        |
| /                 | SO <sub>3</sub>                              | oleum with 36 wt%<br>free SO <sub>3</sub>    | 50                  | 100                               | 3080000                      | 15        |

<sup>a</sup> Reaction conditions: 2.5 MPa CH<sub>4</sub>, 100 mL 50 mM K<sub>2</sub>S<sub>2</sub>O<sub>8</sub> aqueous solution, 1 h reaction time, 25 °C, 365 nm UV LED (320 mW/cm<sup>2</sup>).

**Table S5.** Reaction conditions and CH<sub>3</sub>COOH production rates compared with reported literatures.

| Catalysts                 | Substrates          | Oxidant/<br>reactant                         | Solvent          | Temperature<br>(°C) | CH <sub>4</sub> Pressure<br>(bar) | CH <sub>3</sub> COOH<br>yields (μmol/h) | Ref.      |
|---------------------------|---------------------|----------------------------------------------|------------------|---------------------|-----------------------------------|-----------------------------------------|-----------|
| / <sup>a</sup>            | CH <sub>4</sub>     | K <sub>2</sub> S <sub>2</sub> O <sub>8</sub> | H <sub>2</sub> O | 25                  | 25                                | 208.3                                   | This work |
| RhFe-MoS <sub>2</sub>     | CH <sub>4</sub> +CO | O <sub>2</sub>                               | H <sub>2</sub> O | 25                  | 5                                 | 0.524                                   | 16        |
| (Pt/NPW)/TiO <sub>2</sub> | CH <sub>4</sub> +CO | H <sub>2</sub> O                             | H <sub>2</sub> O | 20                  | 10                                | 0.972                                   | 17        |
| Ag/AgCl-WO <sub>3-x</sub> | CH <sub>4</sub>     | O <sub>2</sub>                               | H <sub>2</sub> O | 25                  | 0.01                              | 3.77                                    | 18        |
| PdO/Pd-WO <sub>3</sub>    | CH <sub>4</sub>     | PdO                                          | H <sub>2</sub> O | 25                  | 1                                 | 9.855                                   | 19        |
| AuFe/ZSM-5                | CH <sub>4</sub> +CO | O <sub>2</sub>                               | H <sub>2</sub> O | 80                  | 28                                | 95                                      | 20        |
| Rh-ZSM-5                  | CH <sub>4</sub> +CO | O <sub>2</sub>                               | H <sub>2</sub> O | 150                 | 20                                | 142                                     | 21        |

<sup>a</sup> Reaction conditions: 2.5 MPa CH<sub>4</sub>, 100 mL 50 mM K<sub>2</sub>S<sub>2</sub>O<sub>8</sub> aqueous solution, 1 h reaction time, 25 °C, 365 nm UV LED (320 mW/cm<sup>2</sup>).

## Supplementary Note 1

To explain the effect of methyl bisulfate (MBS,  $\text{CH}_3\text{SO}_4\text{H}$ ) addition over the production of methanesulfonic acid (MSA), acetic acid (AA) and acetone, we conducted a simple kinetic model to describe the formation and consumption of key intermediates in the system.

The model is based on a set of elementary steps:

- (1)  $\text{S}_2\text{O}_8^{2-} (\text{PDS}) \rightarrow 2 \text{SO}_4^{\bullet-}, k_1$
- (2)  $\text{SO}_4^{\bullet-} + \text{H}_2\text{O} \rightarrow \bullet\text{OH} + \text{SO}_4^{2-} + \text{H}^+, k_2$
- (3)  $\text{SO}_4^{\bullet-} + \text{CH}_4 \rightarrow \bullet\text{CH}_3 + \text{SO}_4^{2-} + \text{H}^+, k_3$
- (4)  $\bullet\text{OH} + \text{CH}_4 \rightarrow \bullet\text{CH}_3 + \text{H}_2\text{O}, k_4$
- (5)  $\text{SO}_4^{\bullet-} + \bullet\text{CH}_3 + \text{H}^+ \rightarrow \text{CH}_3\text{SO}_4\text{H} (\text{MBS}), k_5$
- (6)  $\text{CH}_3\text{SO}_4\text{H} (\text{MBS}) + \bullet\text{CH}_3 \rightarrow \text{CH}_3\text{SO}_3\text{H} (\text{MSA}) + \text{CH}_3\text{O}\bullet, k_6$
- (7)  $\text{CH}_3\text{O}\bullet + \bullet\text{OH} \rightarrow \text{CH}_2\text{O} + \text{H}_2\text{O}, k_7$
- (8)  $\text{CH}_2\text{O} + \bullet\text{OH} \rightarrow \text{CHO}\bullet + \text{H}_2\text{O}, k_8$
- (9)  $\text{CHO}\bullet + \bullet\text{OH} \rightarrow \text{CO} + \text{H}_2\text{O}, k_9$
- (10)  $\text{CO} + \bullet\text{CH}_3 \rightarrow \text{CH}_3\text{CO}\bullet, k_{10}$
- (11)  $\text{CH}_3\text{CO}\bullet + \bullet\text{OH} \rightarrow \text{CH}_3\text{COOH}, k_{11}$
- (12)  $\text{CH}_3\text{CO}\bullet + \bullet\text{CH}_3 \rightarrow \text{CH}_3\text{COCH}_3, k_{12}$

As the radicals have very short lifetime, the steady-state approximation is applied to the radical species  $[\bullet\text{CH}_3]$ ,  $[\bullet\text{OH}]$ ,  $[\text{SO}_4^{\bullet-}]$ ,  $[\text{CH}_3\text{CO}\bullet]$ ,  $[\text{CH}_3\text{O}\bullet]$ ,  $[\text{CO}]$ ,  $[\text{CH}_2\text{O}]$ ,  $[\text{CHO}\bullet]$ , yielding the following rate equations:

$$(\text{eq1}) \quad k_6[\text{MBS}][\bullet\text{CH}_3] - k_7[\text{CH}_3\text{O}\bullet][\bullet\text{OH}] = 0$$

$$(\text{eq2}) \quad k_7[\text{CH}_3\text{O}\bullet][\bullet\text{OH}] - k_8[\text{CH}_2\text{O}][\bullet\text{OH}] = 0$$

$$(\text{eq3}) \quad k_8[\text{CH}_2\text{O}][\bullet\text{OH}] - k_9[\text{CHO}\bullet][\bullet\text{OH}] = 0$$

$$(\text{eq4}) \quad k_9[\text{CHO}\bullet][\bullet\text{OH}] - k_{10}[\bullet\text{CH}_3][\text{CO}] = 0$$

$$(\text{eq5}) \quad k_{10}[\bullet\text{CH}_3][\text{CO}] - k_{11}[\text{CH}_3\text{CO}\bullet][\bullet\text{OH}] - k_{12}[\text{CH}_3\text{CO}\bullet][\bullet\text{CH}_3] = 0$$

$$(\text{eq6}) \quad k_3[\text{CH}_4][\text{SO}_4^{\bullet-}] + k_4[\text{CH}_4][\bullet\text{OH}] - k_5[\text{SO}_4^{\bullet-}][\bullet\text{CH}_3][\text{H}^+] - k_6[\text{MBS}][\bullet\text{CH}_3] - k_{10}[\bullet\text{CH}_3][\text{CO}] - k_{12}[\text{CH}_3\text{CO}\bullet][\bullet\text{CH}_3] = 0$$

$$(eq7) \quad 2k_1[PDS] - k_2[SO_4^{\bullet-}][H_2O] - k_3[CH_4][SO_4^{\bullet-}] - k_5[SO_4^{\bullet-}][\bullet CH_3][H^+] = 0$$

$$(eq8) \quad k_2[SO_4^{\bullet-}][H_2O] - k_4[CH_4][\bullet OH] - k_7[\bullet OH][CH_3O\bullet] - k_8[CH_2O][\bullet OH] - k_9[CHO\bullet][\bullet OH] - k_{11}[CH_3CO\bullet][\bullet OH] = 0$$

Also, the formation rate of MSA is denoted as  $R(MSA)$ , which can be described as:

$$(eq9) \quad R(MSA) = k_6[MBS][\bullet CH_3]$$

Moreover, the formation rate of  $CH_3COOH$  and  $CH_3COCH_3$  could be described as:

$$(eq10) \quad R(CH_3COOH) = k_{11}[CH_3CO\bullet][\bullet OH]$$

$$(eq11) \quad R(CH_3COCH_3) = k_{12}[CH_3CO\bullet][\bullet CH_3]$$

where  $k_1, k_2, k_3, k_4, k_5, k_6, k_7, k_8, k_9, k_{10}, k_{11}$ , and  $k_{12}$  are all constants,  $[CH_4]$ ,  $[MBS]$ ,  $[H_2O]$ ,  $[PDS]$ ,  $[H^+]$  are constants, and  $[\bullet CH_3]$ ,  $[\bullet OH]$ ,  $[CH_3CO\bullet]$  are variables that we need to solve.

Based on the above equations (eq1) to (eq9), we can solve  $R(MSA)$ , which can be expressed in terms of constants and fixed concentrations:

$$(eq12) \quad R(MSA) = \frac{12B - (6A + Bk_1[PDS]) + \sqrt{(6A + Bk_1[PDS])^2 + 24ABk_1[PDS]}}{2},$$

where  $A = k_2[H_2O] + k_3[CH_4]$ ,  $B = k_6[MBS]k_5[H^+]$  were constants.

From rate equation (eq1) to (eq4), we have this simple relationship:

$$(eq13) \quad R(MSA) = k_{11}[CH_3CO\bullet][\bullet OH] + k_{12}[CH_3CO\bullet][\bullet CH_3]$$

According to (eq12), the formation rate of MSA is predicted to increase as the PDS concentration increases. Similarly, the addition of external MBS should also lead to increase of MSA formation. These predictions are consistent with our experimental results in Figure 3b. Moreover, according to (eq13) and elementary step (6), an increase in MBS leads to a decrease in  $\bullet CH_3$  concentration, thus would lower the rate for  $CH_3COCH_3$  as shown in (eq10). However, since  $R(MSA)$  would increase, the formation rate of  $CH_3COOH$  must also increase, as shown by (eq13).

CO can originate not only from the oxidation of  $CH_3O\bullet$  but also from the direct oxidation and dehydrogenation of  $\bullet CH_3$ . To account for this possibility, we developed

an additional kinetic model to explained the effect of CO addition on CH<sub>3</sub>COOH and CH<sub>3</sub>COCH<sub>3</sub> formation rate. To simplify this system, we assume •OH radical is the only species to active CH<sub>4</sub> and therefore only considered reactions involving •OH radicals.

- i.    •OH + CH<sub>4</sub> → •CH<sub>3</sub> + H<sub>2</sub>O, k<sub>1</sub>
- ii.   CO + •CH<sub>3</sub> → CH<sub>3</sub>CO•, k<sub>2</sub>
- iii.   CH<sub>3</sub>CO• + •OH → CH<sub>3</sub>COOH, k<sub>3</sub>
- iv.    CH<sub>3</sub>CO• + •CH<sub>3</sub> → CH<sub>3</sub>COCH<sub>3</sub>, k<sub>4</sub>

The following rate equations are obtained:

$$(eq\ i) \quad k_2[•CH_3][CO] - k_3[CH_3CO•][•OH] - k_4[CH_3CO•][•CH_3] = 0$$

$$(eq\ ii) \quad k_1[CH_4][•OH] - k_2[•CH_3][CO] - k_4[CH_3CO•][•CH_3] = 0$$

$$[•CH_3] = \frac{k_1[CH_4][•OH]}{k_2[CO] + k_4[CH_3CO•]}$$

Assume  $k_2[CO] \gg k_4[CH_3CO•]$ ,

$$\text{Then, } [•CH_3] = \frac{k_1[CH_4][•OH]}{k_2[CO]}$$

$$CH_3COOH \text{ formation rate} = k_{11}[CH_3CO•][•OH] = \frac{k_1 k_2 k_3 [•OH]}{k_2 k_3 + k_1 k_4 [CH_4]/[CO]}$$

$$CH_3COCH_3 \text{ formation rate} = k_4[CH_3CO•][•CH_3] = \frac{k_1^2 k_4 [CH_4]^2 [•OH]}{k_2 k_3 [CO] + k_1 k_4 [CH_4]}$$

In this framework, an increase in CO concentration is expected to promote the formation of CH<sub>3</sub>COOH while reducing the formation of CH<sub>3</sub>COCH<sub>3</sub>, which is also consistent with our results (Figure 3c).

## Supplementary references

- 1 Y. Huang, J. Zou, J. Lin, H. Yang, M. Wang, J. Li, W. Cao, B. Yuan and J. Ma, *Environmental Science & Technology* 2023, **57**, 18420–18432.
- 2 T. N. Das, *The Journal of Physical Chemistry A* 2001, **105**, 9142–9155.
- 3 L. Luo, Z. Gong, Y. Xu, J. Ma, H. Liu, J. Xing and J. Tang, *J. Am. Chem. Soc.* 2022, **144**, 740–750.
- 4 L. Dai, J. Xu, J. Lin, L. Wu, H. Cai, J. Zou and J. Ma, *Chemosphere* 2021, **272**, 128577.
- 5 J. Deng, S.-C. Lin, J. Fuller, J. A. Iñiguez, D. Xiang, D. Yang, G. Chan, H. M. Chen, A. N. Alexandrova and C. Liu, *Nat. Commun.* 2020, **11**, 3686.
- 6 D. Xiang, J. A. Iñiguez, J. Deng, X. Guan, A. Martinez and C. Liu, *Angew. Chem. Int. Ed.* 2021, **60**, 18152–18161.
- 7 J. Deng, S.-C. Lin, J. T. Fuller III, B. Zandkarimi, H. M. Chen, A. N. Alexandrova and C. Liu, *Angew. Chem. Int. Ed.* 2021, **60**, 26630–26638.
- 8 M. E. O'Reilly, R. S. Kim, S. Oh and Y. Surendranath, *ACS Central Science* 2017, **3**, 1174–1179.
- 9 R. A. Periana, D. J. Taube, S. Gamble, H. Taube, T. Satoh and H. Fujii, *Science* 1998, **280**, 560–564.
- 10 R. A. Periana, D. J. Taube, E. R. Evitt, D. G. Löffler, P. R. Wentrock, G. Voss and T. Masuda, *Science* 1993, **259**, 340–343.
- 11 N. Basicke, T. E. Hogan and A. Sen, *J. Am. Chem. Soc.* 1996, **118**, 13111–13112.
- 12 J. Britschgi, M. Bilke, W. Schuhmann and F. Schüth, *ChemElectroChem* 2022, **9**, e202101253.
- 13 J. Britschgi, W. Kersten, S. R. Waldvogel and F. Schüth, *Angew. Chem. Int. Ed.* 2022, **61**, e202209591.
- 14 S. Mukhopadhyay and A. T. Bell, *Angew. Chem. Int. Ed.* 2003, **42**, 2990–2993.
- 15 C. Díaz-Urrutia and T. Ott, *Science* 2019, **363**, 1326–1329.
- 16 J. Mao, H. Liu, Y. Li, M. Gao, Y. Zhang, Y. Song, M. Zhang, G. Xu, W. Zhou, L. Yu, X. Cui and D. Deng, *J. Am. Chem. Soc.* 2025, **147**, 14530–14540.
- 17 C. Dong, M. Marinova, K. B. Tayeb, O. V. Safonova, Y. Zhou, D. Hu, S. Chernyak, M. Corda, J. Zaffran, A. Y. Khodakov and V. V. Ordonsky, *J. Am. Chem. Soc.* 2023, **145**, 1185–1193.
- 18 J. Wang, L. Zhang, D. Zeng, W. Wang, R. Li, T. Jia, B. Cui, H. Chu and W. Wang, *Appl. Catal. B: Environ.* 2023, **337**, 122983.
- 19 W. Zhang, D. Xi, Y. Chen, A. Chen, Y. Jiang, H. Liu, Z. Zhou, H. Zhang, Z. Liu, R. Long and Y. Xiong, *Nat. Commun.* 2023, **14**, 3047.
- 20 B. Wu, H. Yin, X. Ma, R. Liu, B. He, H. Li and J. Zeng, *Angew. Chem. Int. Ed.* 2025, **64**, e202412995.
- 21 J. Shan, M. Li, L. F. Allard, S. Lee and M. Flytzani-Stephanopoulos, *Nature* 2017, **551**, 605–608.
